# Supplementary material
Source: Springer Nature journal article supplement (https://www.springerprofessional.de/resource/supplementary/13660_2010_14_MOESM1_ESM.pdf/6387652)

Newton Method for the SOCIS

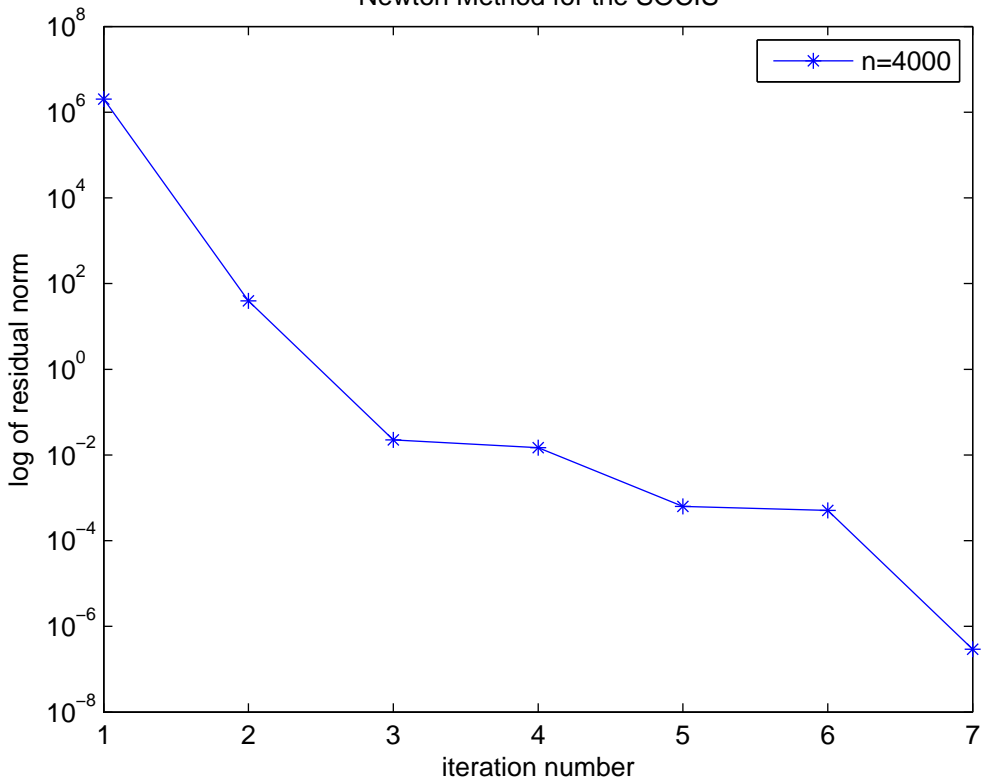

Supplement: MOESM1 [file 6387652]
